# Supplementary material for: Rational Design of Resveratrol O-methyltransferase for the Production of Pinostilbene
Source: MDPI journal article supplement (doi:10.3390/ijms22094345), 2021-04-21
Supplement: s1 [file s1]

## Supplementary information

# Rational design of resveratrol O-methyltransferase for the production of pinostilbene

Daniela P. Herrera <sup>1</sup>, Andrea M. Chánique <sup>1,2</sup>, Ascensión Martínez-Márquez <sup>3</sup>, Roque Bru-Martínez <sup>3</sup>, Robert Kourist <sup>2</sup>, Loreto P. Parra <sup>4,\*</sup> and Andreas Schüller <sup>4,5,\*</sup>

<sup>1</sup> Department of Chemical and Bioprocesses Engineering, School of Engineering, Pontificia Universidad Católica de Chile, Vicuña Mackenna 4860, 7820244, Santiago, Chile; [dpheerrer@uc.cl](mailto:dpheerrer@uc.cl) (D.H.); [amchanique@uc.cl](mailto:amchanique@uc.cl) (A.C.)

<sup>2</sup> Institute of Molecular Biotechnology, Graz University of Technology, Petersgasse 14, 8010 Graz, Austria; [kourist@tugraz.at](mailto:kourist@tugraz.at) (R.K.)

<sup>3</sup> Department of Agrochemistry and Biochemistry, Faculty of Science and Multidisciplinary Institute for Environmental Studies "Ramon Margalef", University of Alicante, Alicante, Spain; [roque.bru@gcloud.ua.es](mailto:roque.bru@gcloud.ua.es) (R.B.M.); [asun.martinez@gcloud.ua.es](mailto:asun.martinez@gcloud.ua.es) (A.M.M)

<sup>4</sup> Institute for Biological and Medical Engineering, Schools of Engineering, Medicine and Biological Sciences, Pontificia Universidad Católica de Chile, Vicuña Mackenna 4860, 7820244, Santiago, Chile; (L.P.)

<sup>5</sup> Department of Molecular Genetics and Microbiology, School of Biological Sciences, Pontificia Universidad Católica de Chile, Av. libertador Bernardo O'Higgins 340, 8320000 Santiago, Chile; (A.S).

\* To whom correspondence should be sent: [aschueller@bio.puc.cl](mailto:aschueller@bio.puc.cl), [lparraa@ing.puc.cl](mailto:lparraa@ing.puc.cl)

## Index

|          |                                                                                              |           |
|----------|----------------------------------------------------------------------------------------------|-----------|
| <b>1</b> | <b>Supplementary Figures.....</b>                                                            | <b>3</b>  |
|          | Figure S1. Size exclusion chromatography (SEC) of W20A and F24A variants.....                | 3         |
|          | Figure S2. Multiple sequence alignment of OMT-I with activity on stilbenes.....              | 4         |
|          | Figure S3 Calibration curves for LC-MS/MS.....                                               | 5         |
|          | Figure S4. Example of LC-MS/MS transition chromatogram of stilbenes.....                     | 6         |
|          | Figure S5. Purification of VvROMT Wt. and variants.....                                      | 7         |
| <b>2</b> | <b>Supplementary Tables.....</b>                                                             | <b>8</b>  |
|          | Table S1. Specific and promiscuous OMT-I actives on stilbenes.....                           | 8         |
|          | Table S2. OMT-I used for the phylogenetic tree construction.....                             | 9         |
|          | Table S3. Primer sequences for variant construction by Gibson Assembly.....                  | 11        |
|          | Table S4. Primer sequence for VvROMT variants construction by QuickChange <sup>a</sup> ..... | 12        |
|          | Table S5. LC-MS/MS parameters for targeted compounds.....                                    | 12        |
|          | Table S6. Conversion rate of wildtype and VvROMT variants.....                               | 13        |
| <b>3</b> | <b>Supplementary sequences.....</b>                                                          | <b>14</b> |

# 1 Supplementary Figures

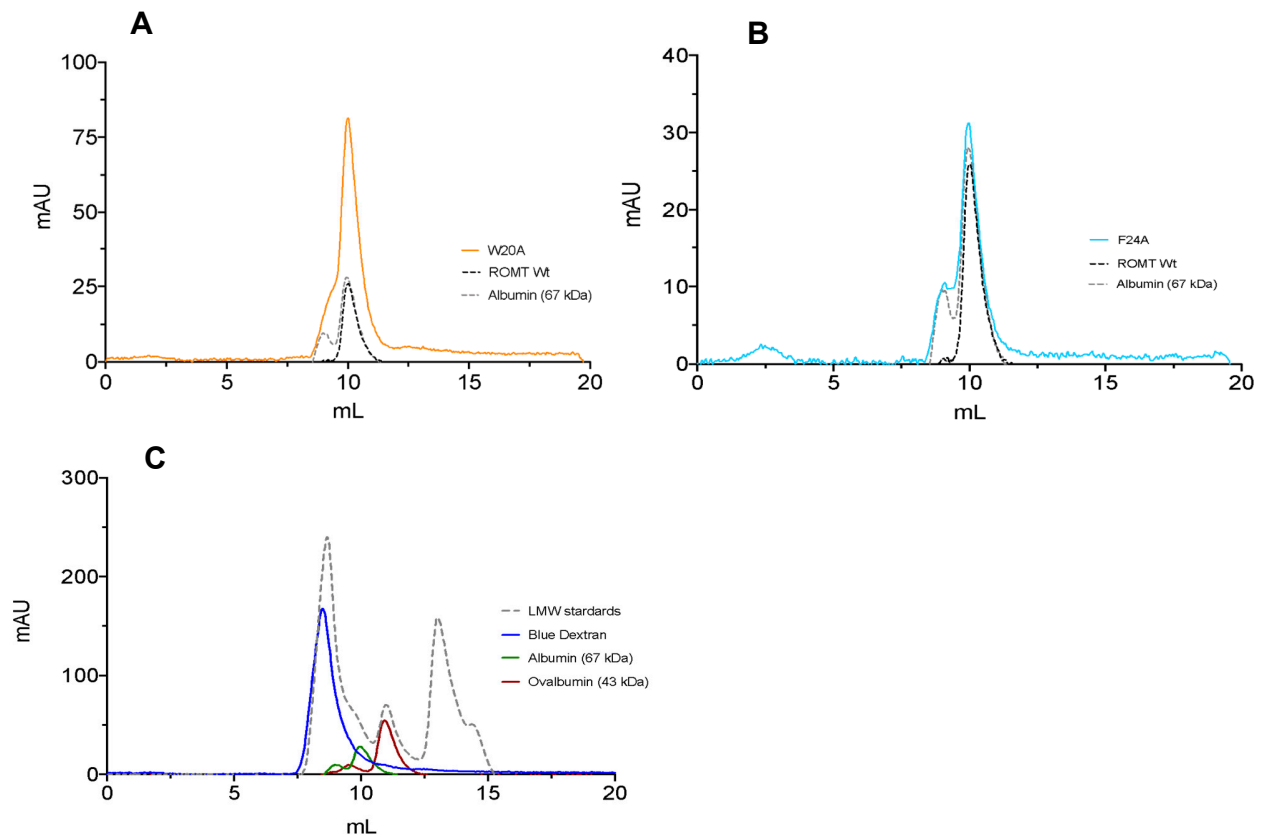

**Figure S1. Size exclusion chromatography (SEC) of W20A and F24A variants.**

Chromatograms of ROMT alanine variants W20A (Orange) (A), F24A (light blue) (B), and standard proteins (C). The absorbance at 280 nm against elution volume of the proteins is shown. The experiment was carried out using the Superdex 75 10/300 GL (GE Healthcare) column. Elution volume parameter ( $K_{av}$ ) of W20A (0.078) (A) and F24A (0.079) (B) is comparable to the wildtype enzyme (0.079) black dashes lines, and to the Albumin standard protein (0.080), grey dashes lines, which is an indicator of the kDa that represent the VvROMT dimeric conformational state.

In C, the grey curve corresponds to a mix of the Low Molecular Weight standard (LMW) at 3  $\mu\text{g}/\mu\text{L}$  Blue dextran 2000, Albumin (67 kDa), Ovalbumin (45 kDa), Chymotrypsinogen A (25 kDa), and ribonuclease A (18.7 kDa). As a separate run, Blue dextran in blue, Albumin (67 kDa,  $K_{av}$ =0.0802) in green, and Ovalbumin (45 kDa,  $K_{av}$ =0.136) in red. All proteins were prepared at 2  $\mu\text{g}/\mu\text{L}$ , and a range of 150-250  $\mu\text{L}$  of each one was used.

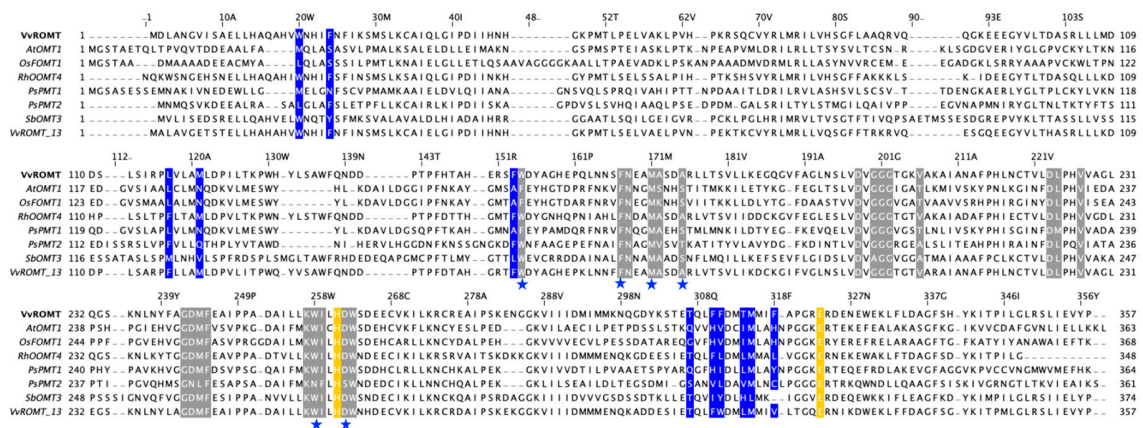

**Figure S2. Multiple sequence alignment of OMT-I with activity on stilbenes**

Substrate interaction residues are blue labeled, residues in contact with SAM are shown in grey. The catalytic residues are highlighted in yellow. The blue stars indicate residues that are in contact with both SAM and the substrate. The residue numbers over the alignment correspond to the VvROMT sequence.

Enzymes with 3/5-OH regioselectivity include VvROMT from *Vitis vinifera* (B6VJS4), RhOoMT4 from *Rosa hybrida* (Q8GU21), AtOMT1 from *Arabidopsis thaliana* (Q9FK25), and OsFOMT1 from *Oryza sativa* (Q6ZD89).

Enzymes with 3-OH regioselectivity correspond to PsPMT1, PsPMT2, from *Pinus sylvestris* (accession number AQX17823 and AQX17825). The enzymes SbOMT3, from *Sorghum bicolor* (A8QW52) and VvROMT13 preferentially, mono-methylate stilbenes.

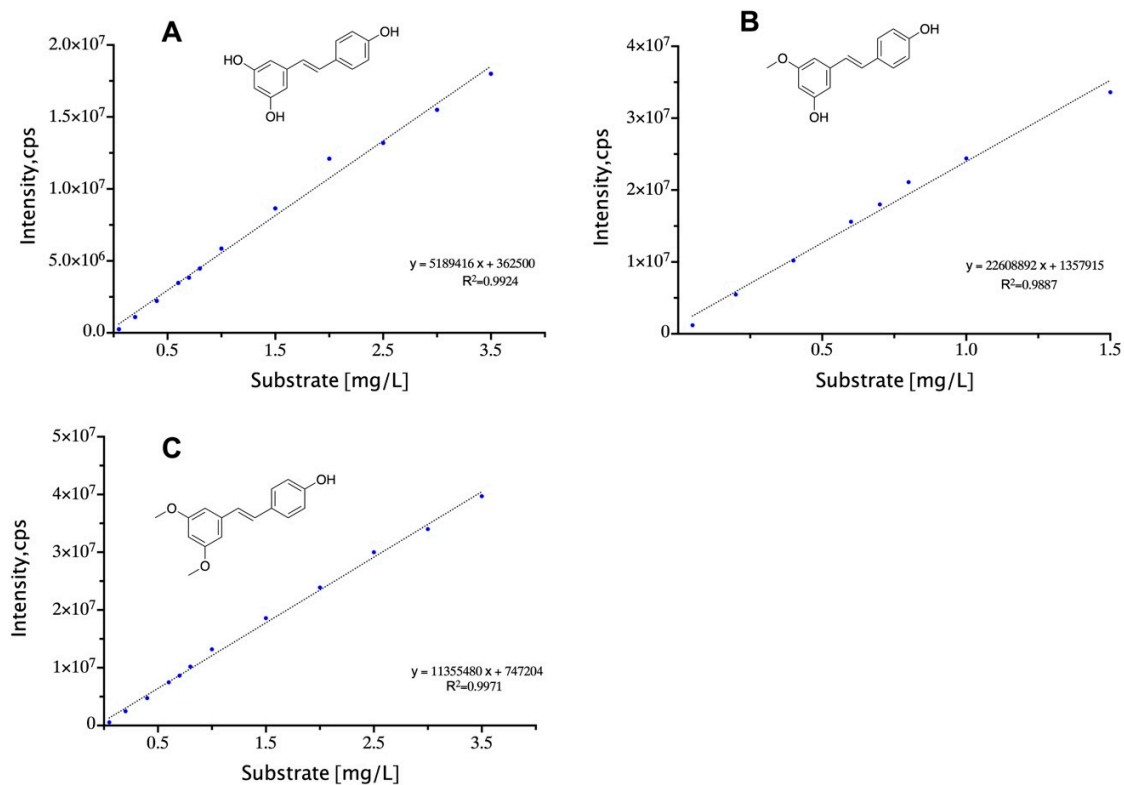

**Figure S3 Calibration curves for LC-MS/MS.**

The calibration curve for LC-MS/MS with the respective standard resveratrol **(A)** pinostilbene **(B)** and pterostilbene **(C)** was carried out in a concentration range between 0.05 mg L<sup>-1</sup> to 3.5 mg L<sup>-1</sup> with 10 μL of injection.

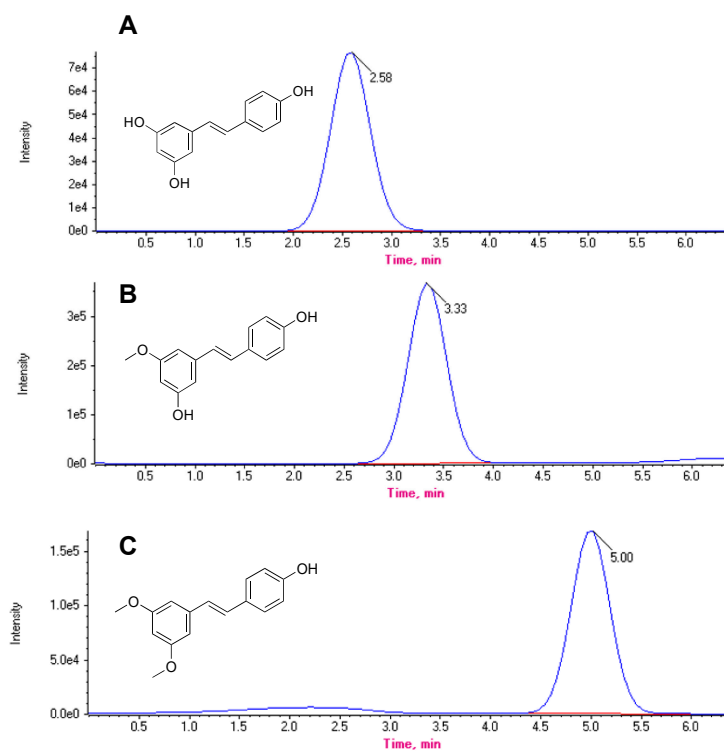

**Figure S4. Example of LC-MS/MS transition chromatogram of stilbenes.**

Resveratrol (A), pinostilbene (B) and pterostilbene (C) at 2.58, 3.33 and 5.00 of retention time and at 0.4 mg L<sup>-1</sup>.

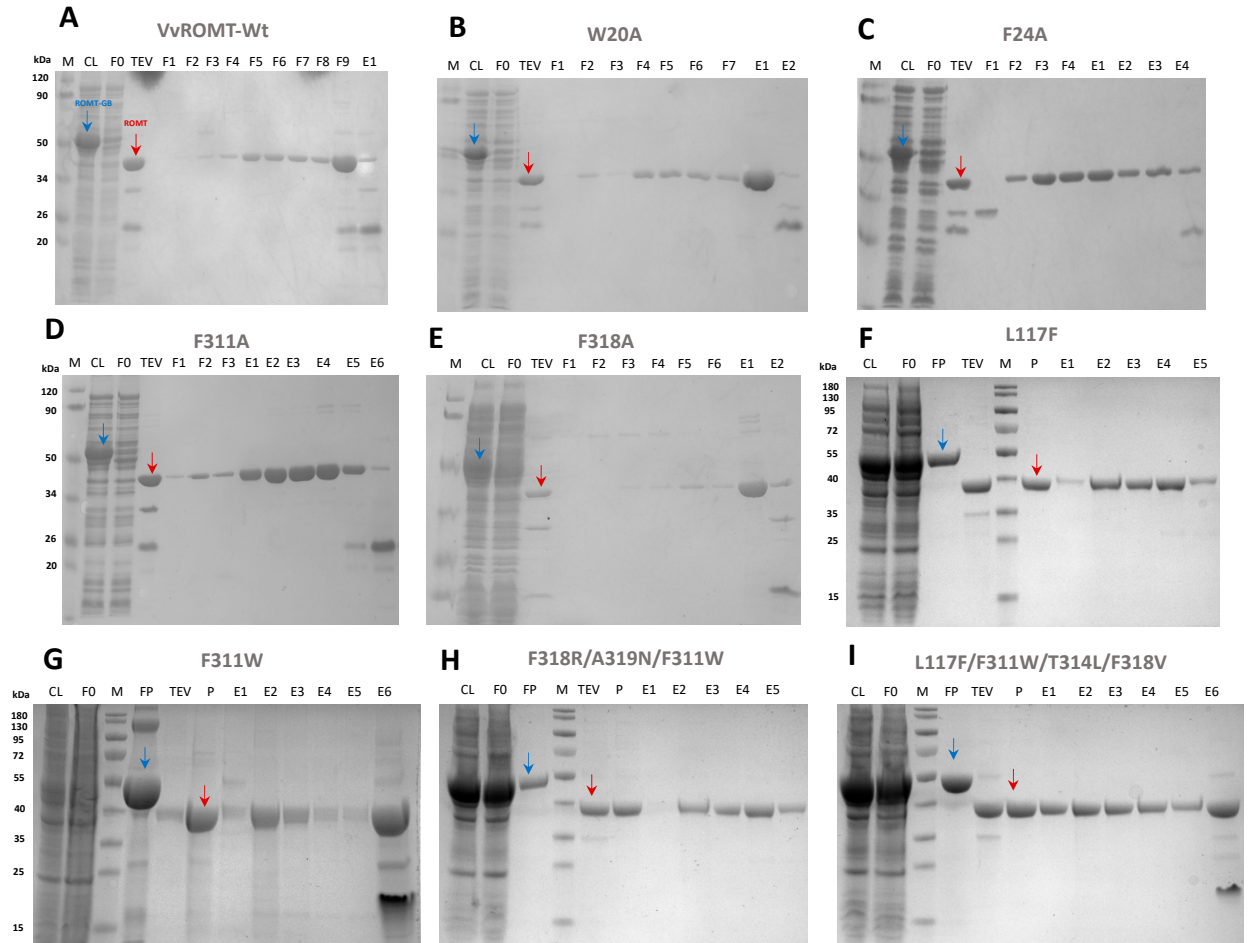

**Figure S5. Purification of VvROMT Wt. and variants.**

SDS-PAGE of purification of VvROMT Wildtype (**A**), W20A (**B**), F24A (**C**), F311A (**D**), F318A (**E**), L117F (**F**), F311W (**G**), F318R/A319N/F311W (**H**) and L117F/F311W/T314L/F318L (**I**). Lane M: protein molecular weight marker, CL: Cell Lysate, F0: Flowthrough after the first purification step, TEV: TEV cleavage, F1-F9: Flowthrough after the second purification, E1-E6: Elution of the second purification, FP: Fusion Protein and P: Purified protein. Blue arrows indicate VvROMT as a fusion protein (ROMT-GB, 47.8 kDa), and red arrows indicate VvROMT free after TEV cleave (~40.3 kDa).

## 2 Supplementary Tables

Table S1. Specific and promiscuous OMT-I actives on stilbenes.

| Species                     | Enzyme name | Uniprot code          | Substrate specificity                                             | Stilbene regioselectivity | % Id seq. with ROMT | Reference <sup>[c]</sup>                               |
|-----------------------------|-------------|-----------------------|-------------------------------------------------------------------|---------------------------|---------------------|--------------------------------------------------------|
| <i>Vitis vinifera</i>       | VvROMT      | B6VJS4                | Pinostilbene > Resveratrol                                        | 3/5-OH                    | 100                 | Schmidlin et al., (2008) [28]                          |
| <i>Arabidopsis thaliana</i> | AtOMT1      | Q9FK25                | Flavone > Caffeic acid > Resveratrol > Pinostilbene               | 3/5-OH                    | 33.2                | Heo et al.,(2017) [26]                                 |
| <i>Oryza sativa</i>         | OsOMT1      | Q6ZD89 <sup>[a]</sup> | Flavone > Pinosylvin> Resveratrol                                 | 3/5-OH                    | 31.5                | Kim et al., (2006) [33]                                |
| <i>Rosa hybrida</i>         | RhOOMT4     | Q8GU21                | Orcinol > Resveratrol                                             | 3/5-OH                    | 68.9                | Martinez-Márquez et al., (2018) [31]                   |
| <i>Pinus sylvestris</i>     | PsPMT2      | AQX17823              | Pinosylvin> Resveratrol                                           | 3-OH                      | 30.7                | Paasela et al., (2017) [35]                            |
| <i>Pinus sylvestris</i>     | PsPMT1      | AQX17825              | Piceatannol > Caffeic acid > Flavonoid > Pinosylvin > Resveratrol | 3-OH                      | 31.4                | Chiron et al., (2000) [34] Paasela et al., (2017) [35] |
| <i>Sorghum bicolor</i>      | SbOMT3      | A8QW53                | Pentylresorcinol > Resorcinol > Resveratrol                       | 3-OH <sup>[b]</sup>       | 45.9                | Rimando et al., (2012) [27]                            |
| <i>Sorghum bicolor</i>      | SbOMT1      | A8QW52                | Eugenol> Orcinol monomethyl ether > Resveratrol                   | 4-OH                      | 31.6                | Rimando et al., (2012) [27]                            |
| <i>Acorus calamus</i>       | AcOMT1      | A0A5A4PX L6           | Resveratrol > Isoraponthigenin                                    | 4-OH                      | 51.6                | Koeduka et al., (2018) [32]                            |

<sup>[a]</sup> Described as pinosylvin methyltransferase by Kasuyana et al., (2007).

<sup>[b]</sup> Regioselectivity of 3 and 5 OH when is expressed in planta, but mostly 3-OH in bacteria.

<sup>[c]</sup>Reference number correspond to the principal manuscript.



**Table S2. OMT-I used for the phylogenetic tree construction**

| Abbreviated enzyme name | UniProt code | Plant species                | Phenylpropanoid group |
|-------------------------|--------------|------------------------------|-----------------------|
| VvROMT                  | B6VJS4       | <i>Vitis vinifera</i>        | Stilbenes             |
| HiOMT3                  | B0ZB57       | <i>Humulus lupulus</i>       | n.c <sup>[1]</sup>    |
| Mp8FOMT                 | Q6VMW0       | <i>Mentha x piperita</i>     | Flavonoids            |
| CrFOMT                  | Q8GSN1       | <i>Catharanthus roseus</i>   | Flavonoids            |
| ObCVOMT1                | Q93WU3       | <i>Ocimum basilicum</i>      | Phenylpropenes        |
| ObEOMT1                 | Q93WU2       | <i>Ocimum basilicum</i>      | Phenylpropenes        |
| Ge7IOMT                 | Q84KK5       | <i>Glycyrrhiza echinata</i>  | Isoflavonoids         |
| Ms7IOMT9                | O22309       | <i>Medicago sativa</i>       | Isoflavonoids         |
| Ms7IOMT6                | O22308       | <i>Medicago sativa</i>       | Isoflavonoids         |
| Lj4IOMT                 | Q84KK4       | <i>Lotus japonicus</i>       | Isoflavonoids         |
| Mt4IOMT                 | Q29U70       | <i>Medicago truncatula</i>   | Isoflavonoids         |
| Gm4FOMT2                | C6TAY1       | <i>Glycine max</i>           | Isoflavonoids         |
| ZmOMT                   | P47917       | <i>Zea mays</i>              | Alkylresorcinol       |
| Cj6OMT                  | Q9LEL6       | <i>Coptis japonica</i>       | Alkaloids             |
| Ig4OMT                  | Q84KK6       | <i>Glycyrrhiza echinata</i>  | Isoflavonoids         |
| SbOMT3                  | A8QW53       | <i>Sorghum bicolor</i>       | Alkylresorcinol       |
| Ps4OMT2                 | Q7XB10       | <i>Papaver somniferum</i>    | Alkaloids             |
| Cj4OMT                  | Q9LEL5       | <i>Coptis japonica</i>       | Alkaloids             |
| OsFOMT                  | Q53QK0       | <i>Oryza sativa</i>          | Flavonoids            |
| Ps6OMT                  | Q6WUC1       | <i>Papaver somniferum</i>    | Alkaloids             |
| Ps4OMT1                 | Q7XB11       | <i>Papaver somniferum</i>    | Alkaloids             |
| Ps7OMT                  | Q6WUC2       | <i>Papaver somniferum</i>    | Alkaloids             |
| PsN7OMT                 | C7SDN9       | <i>Papaver somniferum</i>    | Alkaloids             |
| HmOMT2                  | B0ZB56       | <i>Humulus lupulus</i>       | Chalcones             |
| CjOMT                   | Q8H9A8       | <i>Coptis japonica</i>       | Alkaloids             |
| HiOMT1                  | B0ZB55       | <i>Humulus lupulus</i>       | Chalcones             |
| TaFOMT2                 | Q38J50       | <i>Triticum aestivum</i>     | Flavonoids            |
| SoCOMT1                 | O82054       | <i>Saccharum officinarum</i> | Phenylpropenes        |
| CaCOMT1                 | Q9FQY8       | <i>Capsicum annuum</i>       | Phenylpropenes        |
| AtOMT1                  | Q9FK25       | <i>Arabidopsis thaliana</i>  | Flavonoids            |
| PtCOMT1                 | Q00763       | <i>Populus tremuloides</i>   | Phenylpropenes        |

|           |          |                                               |                |
|-----------|----------|-----------------------------------------------|----------------|
| CaFOMT2   | Q42653   | <i>Chrysosplenium americanum</i>              | Flavonoids     |
| CaFOMT1   | P59049   | <i>Chrysosplenium americanum</i>              | Flavonoids     |
| PtCOMT2   | Q41086   | <i>Populus tremuloides</i>                    | Phenylpropenes |
| PsPgCOMT1 | Q43046   | <i>P. sieboldii</i> x <i>P. grandidentata</i> | Phenylpropenes |
| CbCOMT1   | O23760   | <i>Clarkia breweri</i>                        | Phenylpropenes |
| PsPgCOMT3 | Q43047   | <i>P. sieboldii</i> x <i>P. grandidentata</i> | Phenylpropenes |
| CcCOMT    | O81646   | <i>Capsicum chinense</i>                      | Phenylpropenes |
| CcCOMT1   | Q8LL87   | <i>Coffea canephora</i>                       | Phenylpropenes |
| ZmCOMT1   | Q06509   | <i>Zea mays</i>                               | Phenylpropenes |
| RsCOMT1   | Q8GU25   | <i>Rosa chinensis</i>                         | Phenylpropenes |
| ObCOMT1   | Q9XGW0   | <i>Ocimum basilicum</i>                       | Phenylpropenes |
| CrCOMT1   | Q8W013   | <i>Catharanthus roseus</i>                    | Phenylpropenes |
| TaFOMT1   | Q84N28   | <i>Triticum aestivum</i>                      | Flavonoids     |
| PdCOMT1   | Q43609   | <i>Prunus dulcis</i>                          | Phenylpropenes |
| EguCOMT1  | P46484   | <i>Eucalyptus gunnii</i>                      | Phenylpropenes |
| AmCOMT1   | Q6T1F5   | <i>Ammi majus</i>                             | Phenylpropenes |
| ObCOMT2   | Q9XGV9   | <i>Ocimum basilicum</i>                       | Phenylpropenes |
| EglCOMT1  | Q9SWC2   | <i>Eucalyptus globulus</i>                    | Phenylpropenes |
| SbOMT1    | A8QW52   | <i>Sorghum bicolor</i>                        | Phenylpropenes |
| Os7FOMT   | Q0IP69   | <i>Oryza sativa</i>                           | Flavonoids     |
| PaAMT1    | B8RCD3   | <i>Pimpinella anisum</i>                      | Phenylpropenes |
| OsFOMT1   | Q6ZD89   | <i>Oryza sativa Japonica Group</i>            | Flavonoids     |
| PsPMT2    | AQX17823 | <i>Pinus sylvestris</i>                       | Stilbenes      |
| PsPMT1    | AQX17825 | <i>Pinus sylvestris</i>                       | Flavonoids     |
| VrROMT    | K7XQ68   | <i>Vitis riparia</i>                          | Stilbenes      |
| RhOOMT1   | Q8L5K8   | <i>Rosa hybrid cultivar</i>                   | Phenylpropenes |
| RhOOMT2   | Q8L5K7   | <i>Rosa hybrid cultivar</i>                   | Phenylpropenes |
| RhOOMT4   | Q8GU21   | <i>Rosa hybrid cultivar</i>                   | Phenylpropenes |
| AcOMT1    | A0A5A4   | <i>Acorus calamus</i>                         | Stilbenes      |
| PIOMT     | V9W3E0   | <i>Paenibacillus larvae</i>                   | Outgroup       |
| CsOMT     | B0EXJ8   | <i>Catharanthus roseus</i>                    | Alkaloids      |
| Ps3IOMT1  | O24305   | <i>Pisum sativum</i>                          | Isoflavonoids  |
| Ps3IOMT2  | P0DH60   | <i>Pisum sativum</i>                          | Isoflavonoids  |
| Ms7IOMT8  | O24529   | <i>Medicago sativa</i>                        | Isoflavonoids  |
| MtIOMT3   | Q06YR3   | <i>Medicago truncatula</i>                    | Isoflavonoids  |
| LpCOMT1   | Q9ZTU2   | <i>Lolium perenne</i>                         | Phenylpropenes |
| MsCOMT1   | P28002   | <i>Medicago sativa</i>                        | Phenylpropenes |
| Tf6OMT    | Q5C9L7   | <i>Thalictrum flavum</i>                      | Alkaloids      |

|                                    |        |                        |                |
|------------------------------------|--------|------------------------|----------------|
| CbIEMT1                            | O04385 | <i>Clarkia breweri</i> | Phenylpropenes |
| <sup>[1]</sup> n.c. Not classified |        |                        |                |

**Table S3. Primer sequences for variant construction by Gibson Assembly**

| VvROMT variant <sup>[1]</sup> | Forward 5' to 3'                        | Reverse 5' to 3'                         | Fragment Size (pb) | Template |
|-------------------------------|-----------------------------------------|------------------------------------------|--------------------|----------|
| W20A_1                        | CGTT <b>gcg</b> AACCACATTTCAACTTTATC    | CTGAAACATGGCAAAGGTAGCGT                  | 2,401              | Wt       |
| W20A_2                        | CAACGCTACCTTTGCCATGTTTCAG               | GATAAAGTTGAAAATGTGGTT <b>cg</b> cAACGTG  | 4,156              | Wt       |
| F24A_1                        | CCACATT <b>gcg</b> AACTTTATCAAGAGCATGAG | CTGAAACATGGCAAAGGTAGCGT                  | 2,391              | Wt       |
| F24A_2                        | CAACGCTACCTTTGCCATGTTTCAG               | CTCATGCTCTTGATAAAAGTT <b>cg</b> cAATGTGG | 4,166              | Wt       |
| F311A-1                       | ACTGTT <b>cg</b> cgGACATGACCATGAT       | CGGATGCCGGGAGCAGACAA                     | 2,788              | Wt       |
| F311A_2                       | TTGTCTGCTCCCGGCATCCG                    | ATCATGGTCATGTC <b>cg</b> cgGAACAGT       | 3,769              | Wt       |
| F318A_1                       | ATGACCATGATGATC <b>cg</b> cgGCGC        | CGGATGCCGGGAGCAGACAA                     | 2,775              | Wt       |
| F318A_2                       | TTGTCTGCTCCCGGCATCCG                    | GCGC <b>cg</b> cgGATCATCATGGTCAT         | 3,782              | Wt       |
| L117F-1                       | AGCATTGCTCCG <b>ttc</b> GTGCTGG         | CGGATGCCGGGAGCAGACAA                     | 3375               | Wt       |
| L117F-2                       | TTGTCTGCTCCCGGCATCCG                    | CCAGCAC <b>gaa</b> CGGACGAATGCT          | 3182               | Wt       |
| L117F/F318L-1                 | ATGATGATC <b>ctg</b> GCGCCGGGT          | CGGATGCCGGGAGCAGACAA                     | 2775               | L117F    |
| L117F/F318L-2                 | TTGTCTGCTCCCGGCATCCG                    | ACCCGGCGC <b>cag</b> GATCATCAT           | 3782               | L117F    |

<sup>[1]</sup> Alanine variants were generated using pET25GB1\_ROMT vector as a template (wild type). For the variant L117F/318, it was used pET25GB1\_L117F as a template. Bold lowercase letters indicate the respective codon modification.

**Table S4. Primer sequence for VvROMT variants construction by QuickChange <sup>[1]</sup>**

| ROMT Variant                | Forward 5' to 3'                                                             | Reverse 5' to 3'                                                         | Template    |
|-----------------------------|------------------------------------------------------------------------------|--------------------------------------------------------------------------|-------------|
| F311W                       | ACCGAGACGCAACTGTTCT <b>gg</b> GACATGACCATGATG<br>ATC                         | GATCATCATGGTCATGT <b>cc</b> CAGAACAGTTGCGTC<br>TCGGT                     | WT          |
| L117F/F311W                 | ACCGAGACGCAACTGTTCT <b>gg</b> GACATGACCATGATG<br>ATC                         | GATCATCATGGTCATGT <b>cc</b> CAGAACAGTTGCGTC<br>TCGGT                     | L117F       |
| L117F/F311W<br>T314L/F318V  | CAACTGTTCTGGGACATG <b>cta</b> ATGATGATC <b>g</b> TCGCGC<br>CGGGTCGTGAAC      | GTTACGACCCGGCGCGAcGAT <b>catc</b> ATTAGCAT<br>GTCCCAGAACAGTTG            | L117F/311W  |
| F318R/A319N                 | CAACTGTTCTTTGACATGACCATGATGATC <b>cg</b> <b>Caat</b> CC<br>GGGTCGTGAACGTGACG | CGTCACGTTACGACCCGG <b>attGcg</b> GATCATCAT<br>GGTCATGTCAAAGAACAGTTG      | Wt          |
| F318Y/A319N                 | CGCAACTGTTCTTTGACATGACCATGATGATCT <b>tataat</b><br>CCGGTCGTGAACGTGA          | TCACGTTACGACCCGG <b>attat</b> AGATCATCATGGT<br>CATGTCAAAGAACAGTTGCG      | Wt          |
| F311W<br>/F318R/A319N       | ACCGAGACGCAACTGTTCT <b>gg</b> GACATGACCATGATG<br>ATC                         | GATCATCATGGTCATGT <b>cc</b> CAGAACAGTTGCGTC<br>TCGGT                     | F318Y/A319N |
| L117F/F311L/T314<br>L/F318L | CGGCGCCAGGATCATCAT <b>tag</b> CATGTCT <b>taa</b> GAACAGT<br>TGCCTCTCGGTG     | CACCGAGACGCAACTGTTCT <b>tta</b> GACATG <b>cta</b> ATGA<br>TGATCCTGGCGCCG | L117F/318L  |

<sup>[1]</sup> Variant name, primer sequence and the pET25GB1 plasmid used as a template are indicated. Bold lowercase letters correspond to codon modification.

**Table S5. LC-MS/MS parameters for targeted compounds**

| Compound      | t <sub>R</sub> (min) <sup>[a]</sup> | MRM transition 1<br>( <i>m/z</i> ) | DP (V) <sup>b</sup> | CE (eV) <sup>c</sup> | CXP (V) <sup>d</sup> | MRM transition 2<br>( <i>m/z</i> ) | DP (V) | CE (eV) | CXP (V) |
|---------------|-------------------------------------|------------------------------------|---------------------|----------------------|----------------------|------------------------------------|--------|---------|---------|
| Resveratrol   | 2.53                                | 227.000 > 143.000                  | -90.00              | -34.00               | -5.00                | 227.000 > 184.900                  | -90.0  | -26.00  | -15.00  |
| Pinostilbene  | 3.31                                | 241.034 > 224.900                  | -75.00              | -30.00               | -15.00               | 241.034 > 180.900                  | -75.0  | -40.00  | -11.00  |
| Pterostilbene | 4.95                                | 255.148 > 239.900                  | -105.00             | -24.00               | -7.00                | 255.148 > 196.900                  | -105.0 | -38.00  | -15.00  |

<sup>[a]</sup> t<sub>R</sub>: Retention time, <sup>b</sup> DP: Declustering potential, <sup>c</sup> CE: Collision energy, <sup>d</sup> CXP: Collision cell exit potential.

| 24h reaction            |                     | From Resveratrol |                     |                     |                    | From Pinostilbene |                     |
|-------------------------|---------------------|------------------|---------------------|---------------------|--------------------|-------------------|---------------------|
| Enzyme                  | μM PIN              | μM PTS           | % Conversion to PIN | % Conversion to PTS | % Total Conversion | μM PTS            | % Conversion to PTS |
| Wt                      | n.c. <sup>[a]</sup> | 128.7            | n.c                 | 44.2                | 44.2               | 239.1             | 88.7                |
| F311W                   | 39.7                | 94.3             | 13.3                | 31.5                | 44.7               | 98.2              | 30.0                |
| L117F                   | 168.5               | 71.0             | 49.6                | 20.9                | 70.5               | 240.0             | 89.7                |
| L117/F311W              | 222.2               | 23.3             | 66.6                | 7.0                 | 73.6               | 61.3              | 19.1                |
| L117F/F311W/T314L/F318V | 96.69               | 5.60             | 34.9                | 2.0                 | 36.9               | 15.5              | 4.8                 |
| L117F/F311W/T314L/F318L | 23.51               | 5.02             | 9.6                 | 2.0                 | 11.7               | 12.9              | 4.2                 |
| F318Y/A319N             | <1                  | 46.11            | <1                  | 17.5                | 17.5               | 60.1              | 19.1                |
| F318R/A319N             | 16.07               | n.c              | 7.2                 | 0%                  | 7.2                | 11.0              | 3.4                 |
| F318R/A319N/F311W       | <1                  | n.c              | <1                  | n.c                 | <1                 | n.c               | n.c                 |

**Table S6. Conversion rate of wildtype and VvROMT variants**

<sup>[a]</sup> n.c.: Not converted

### 3 Supplementary sequences

#### Sequence S1. Nucleotide synthesized sequence of VvROMT.

Accession no. FM178870. Codons were optimized for *E. coli* protein expression; bold letters correspond to the *NdeI* and *XhoI* restriction sites used for cloning.

>**CATATG**GACCTGGCGAACGGCGTGATTAGCGCGGAGCTGCTGCATGCGCAGGCGCACGTTTGAACCACATTTTCAA  
CTTTATCAAGAGCATGAGCCTGAAATGCGCGATTCAACTGGGCATCCCGGATATCATTACAACCACGGCAAGCCGAT  
GACCCTGCCGGAAGTGGTGGCGAAGCTGCCGGTTCACCCGAAACGTAGCCAGTGCGTGTACCGTCTGATGCGTATCCT  
GGTTCACAGCGTTTTCTGGCGGCGCAACGTGTGCAGCAAGGCAAAGAGGAAGAGGGTTATGTTCTGACCGACGCGA  
GCCGTCTGCTGCTGATGGACGATAGCCTGAGCATTCTCCGCTGGTGGCGATGCTGGATCCGATCCTGACCAAAC  
CGTGGCACTACCTGAGCGCGTGGTTCCAGAACGACGATCCGACCCGTTTACACCCGCGCACGAGCGTAGCTTCTGGG  
ACTATGCGGGCCACGAGCCGCAACTGAACAACAGCTTTAACGAAGCGATGGCGAGCGATGCGCGTCTGCTGACCAGC  
GTGCTGCTGAAAGAAGGCCAGGGTGTTCGCGGGCCTGAACAGCCTGGTGGACGTTGGTGGCGGTACCGGCAAGGT  
GGCGAAAGCGATTGCGAACGCGTTCCGCACCTGAACGACCGTTCTGGATCTGCCGCACGTGGTTGCGGGCCTGCA  
AGGTAGCAAGAACCTGAACACTTCGCGGGTGATATGTTTGAGGCGATCCCGCCGGCGGATGCGATTCTGCTGAAATG  
GATCCTGCACGACTGGAGCGATGAAGAGTGCGTGAAGATTCTGAAACGTTGCCGTGAGGCGATCCCGAGCAAGGAAA  
ACGGCGGTAAAGTTATCATCATCGACATGATCATGATGAAGAACCAGGGCGATTATAAAGCACCGAGACGCAACTGT  
TCTTTGACATGACCATGATGATCTTCGCGCCGGGTCGTGAACGTGACGAAAACGAGTGGGAAAAGCTGTTCTGGATG  
CGGGCTTTAGCCACTACAAAATTACCCCGATCCTGGGTCTGCGTAGCCTGATCGAAGTTTATCCGTA**ACTCGAG**
